# Supplementary material
Source: HighWire-hosted journal article supplement (http://rc.rcjournal.com/highwire/filestream/18214/field_highwire_adjunct_files/11/Supplemental_Table_2.docx)
Supplement: Supplemental_Table_2.docx [file Supplemental_Table_2.docx]

Supplemental Table 2. The risk of bias of the included observational cohort studies.

|  | **Selection** | | | | **Comparability** | **Outcome** | | | **Total**  **scores** |
| --- | --- | --- | --- | --- | --- | --- | --- | --- | --- |
| **Author** | Representativeness of the exposed cohort | Selection of the non-exposed cohort | Ascertainment of exposure | No outcome of interest at start of study | A: Study controls for the most important factor  B: Study controls for any additional factor | Assessment of outcome | Follow-up long enough for outcomes | Adequacy of follow up of cohorts |
| tu/2017 | * | - | * | * | * | * | * | * | 7 |
| azoulay/2017 | * | * | * | * | * | * | * | - | 7 |
| coudroy/2016 | * | * | * | * | - | * | * | * | 7 |
| roca/2015 | * | * | * | * | * | * | * | * | 8 |
